# Supplementary material
Source: ML conference proceedings conference paper supplement (https://proceedings.mlr.press/v32/amin14.html)
Supplement: Supplementary file 1 [file amin14-supp.zip]

## A. Technical Material

**Theorem 4.** *For any  $\epsilon$ , there exists an  $n$  such that  $L_{\min}(T^n) < \epsilon$ , and any algorithm must sample at least  $(32\Delta L_{\min})^{-1}$  observations in order to reconstruct the edge set of  $T^n$  with probability at least  $7/8$ .*

Let  $P_a$  denote the distribution when  $T_n^a$  is the underlying network. Let  $P_b$  denote the distribution when  $T_n^b$  is the underlying network. We show that  $\mathbf{d}_{\text{KL}}(P_a \parallel P_b) \leq 4\Delta L_{\min}$  where  $p_{(u,v)} = q_u = \Delta$ . Theorem 4 then follows by Pinsker's inequality. Specifically, consider any algorithm  $A$  that samples fewer than  $m$  times, and let  $\mathcal{E}$  be the event that the algorithm determines that the edge  $(z_0, a)$  exists. Pinsker's inequality implies that  $|P_a(\mathcal{E}) - P_b(\mathcal{E})| \leq \sqrt{2m\Delta L_{\min}}$ . Thus, so long as  $m < \frac{1}{32\Delta L_{\min}}$ , either  $P_a(\mathcal{E}) < 1/2$  or  $P_b(\mathcal{E}) \geq 1/4$ . Ultimately this implies that the algorithm  $A$  must incorrectly reconstruct the network with probability at least  $1/8$ .

For a collection of vertices  $U \subset V$ , let  $I(U) \in \{0, 1\}^{|U|}$  be a random vector indicating whether each  $u$  is infected. In other words  $I(U)_u = \mathbf{1}[u \in A]$ . For a distribution  $P$  over random variables  $X, Y$ , we use the notation  $P(X)$  to denote the marginal distribution on  $X$  and  $P(X \mid Y)$  to denote the conditional distribution on  $X$ , given  $Y$ . The key lemmas for establishing the lower bound are the following.

**Lemma 6.**  $\mathbf{d}_{\text{KL}}(P_a \parallel P_b) \leq 4p^2(1-q)^2 P_a(z_0 \notin A) \leq 4p^2(1-q)^3(1-pq)^n$

*Proof.* Let  $Z = \{a, b, z_0, z_1\}$ .

$$\begin{aligned} \mathbf{d}_{\text{KL}}(P_a \parallel P_b) &= \mathbf{d}_{\text{KL}}(P_a(I(Z)) \parallel P_b(I(Z))) \\ &\quad + \mathbf{d}_{\text{KL}}(P_a((S, A) \mid I(Z)) \parallel P_b((S, A) \mid I(Z))) \\ &= \mathbf{d}_{\text{KL}}(P_a(I(Z)) \parallel P_b(I(Z))) + 0 \\ &= \mathbf{d}_{\text{KL}}(P_a(I(z_0, z_1)) \parallel P_b(I(z_0, z_1))) \\ &\quad + \mathbf{d}_{\text{KL}}(P_a(I(a, b) \mid I(z_0, z_1)) \parallel P_b(I(a, b) \mid I(z_0, z_1))) \\ &= \mathbf{d}_{\text{KL}}(P_a(I(a, b) \mid I(z_0, z_1)) \parallel P_b(I(a, b) \mid I(z_0, z_1))) \end{aligned}$$

Where the above equalities follow by application of the chain rule of relative entropy; observing that  $(S, A)$  is equally distributed under  $P_a$  and  $P_b$ , given  $Z$ ; chain rule; and the observation that the marginal distribution on  $I(z_0, z_1)$  is identical under both  $P_a$  and  $P_b$ .

Conditioned on  $I(z_0, z_1) = (0, 0)$  (both  $z_0$  and  $z_1$  are uninfected), the distribution on  $I(a, b)$  is identical under both  $P_a$  and  $P_b$ . This is also true when  $I(z_0, z_1) = (1, 1)$ . Therefore:

$$\begin{aligned} \mathbf{d}_{\text{KL}}(P_a \parallel P_b) &= \sum_{x \in \{0, 1\} \times \{0, 1\}} P_a(I(z_0, z_1) = x) \\ &\quad \mathbf{d}_{\text{KL}}(P_a(I(a, b) \mid I(z_0, z_1) = x) \parallel P_b(I(a, b) \mid I(z_0, z_1) = x)) \\ &= P_a(I(z_0, z_1) = (0, 1)) \mathbf{d}_{\text{KL}}(P_a(I(a, b) \mid I(z_0, z_1) = (0, 1)) \\ &\quad \parallel P_b(I(a, b) \mid I(z_0, z_1) = (0, 1))) \\ &\quad + P_a(I(z_0, z_1) = (1, 0)) \mathbf{d}_{\text{KL}}(P_a(I(a, b) \mid I(z_0, z_1) = (1, 0)) \\ &\quad \parallel P_b(I(a, b) \mid I(z_0, z_1) = (1, 0))) \end{aligned}$$

Under  $P_a$ , conditioned on  $I(z_0, z_1) = (0, 1)$ , the vertex  $a$  is infected with probability  $q$ , while the vertex  $b$  is infected

independently with probability  $q + (1-q)p$ . While under  $P_b$ , conditioned on  $I(z_0, z_1) = (0, 1)$ , the vertex  $a$  is infected with probability  $q + (1-q)p$ , while  $b$  is independently infected with probability  $q$ . Thus,  $\mathbf{d}_{\text{KL}}(P_a(I(a, b) \mid I(z_0, z_1) = (0, 1)) \parallel P_b(I(a, b) \mid I(z_0, z_1) = (0, 1))) \leq 2((1-q)p)^2$ , where  $((1-q)p)^2$  upper-bounds the KL-divergence between two Bernoullis whose parameters differ by  $(1-q)p$ .

A similar argument when  $I(a, b) = (1, 0)$  lets us conclude that:

$$\begin{aligned} \mathbf{d}_{\text{KL}}(P_a \parallel P_b) &\leq 2P_a(I(z_0, z_1) = (0, 1))((1-q)p)^2 \\ &\quad + 2P_a(I(z_0, z_1) = (1, 0))((1-q)p)^2 \\ &\leq 2P_a(z_0 \notin A)((1-q)p)^2 + 2P_a(z_1 \notin S)((1-q)p)^2 \\ &= 4P_a(z_0 \notin A)((1-q)p)^2 \end{aligned}$$

Let  $\mathcal{E}$  be the event that (1)  $z_0 \notin S$  (2) for each edge  $(x_i^{(0)}, z_0)$  either  $x_i^{(0)} \notin S$  or  $(x_i^{(0)}, z_0)$  was inactive, and (3) either  $a \notin S$  or  $(a, z_0)$  was inactive.  $z_0 \notin A$  implies  $\mathcal{E}$ . Therefore:

$$\begin{aligned} \mathbf{d}_{\text{KL}}(P_a \parallel P_b) &\leq 4P_a(z_0 \notin A)((1-q)p)^2 \\ &\leq 4P_a(\mathcal{E})(1-q)^2 p^2 \\ &\leq 4(1-q)^3 p^2 ((1-q) + q(1-p))^n \\ &= 4(1-q)^3 p^2 (1-pq)^n \end{aligned}$$

□

**Lemma 7.** *For the tree  $T_a^n$ ,  $p(1-p)(1-q)^2(1-pq)^n \leq L_{\min} \leq (1-pq)^{n-1}$ .*

*Proof.* Recall from Section 4.1 that  $\phi(u, v)$  is the probability that the path  $u-v$  is active, and  $\psi(u, v)$  is the probability that there are no active tributaries for  $u-v$ .

Appealing to Lemma 3, we see that for any edge  $(u, v) \in T_a^n$ ,  $L(v \mid u) = \phi(u, v)\psi(u, v) = p\psi(u, v)$ . For the upper bound, consider the edge  $(z_0, a)$ .  $L_{\min} \leq L(z_0 \mid a) = \phi(z_0, a)\psi(z_0, a) \leq \psi(z_0, a) \leq [1 - q + q(1-p)]^{n-1} = (1-pq)^{n-1}$ . The final inequality follows from the fact that  $z_0 - a$  having no infecting tributaries for  $z_0 - a$  implies that, for each  $x_i^{(0)}$ , either  $x_i^{(0)}$  was not seeded or it was seeded, but the edge  $(x_i^{(0)}, z_0)$  was not active.

For the lower bound, note that  $\psi(\cdot, \cdot)$  is minimized for the edge  $(z_0, z)$ . Let  $\mathcal{E}$  be the event that none of the edges  $(x_i^{(0)}, z_0)$ ,  $(a, z_0)$  are infecting tributaries for  $z_0 - z$ ,  $z_0, z \notin S$ , and the edge  $(z, z_1)$  is inactive.  $\mathcal{E}$  implies that there are no infecting tributaries for  $z_0, z$ . Therefore  $\psi(z_0, z) \geq P_a(\mathcal{E}) = (1-pq)^n(1-q)^2(1-p)$ , and therefore  $L_{\min} = p\psi(z_0, z) \geq p(1-p)(1-q)^2(1-pq)^n$ . □

Let  $p = q = \Delta$  in the previous construction. Combining the previous Lemmas, we can conclude that  $\mathbf{d}_{\text{KL}}(P_a \parallel P_b) \leq 4\Delta L_{\min}$  and this finishes the proof.
